# Supplementary material for: In silico bioprospecting of the Neotropical Plant Mandacaru (Cereus) for antimicrobial property
Source: Research Square preprint supplement (doi:10.21203/rs.3.rs-5743337/v1), 2025-01-09
Supplement: Supplementary file 1 [file db89f09f92367317b399e88f.docx]

***In silico* bioprospecting of the Neotropical Plant Mandacaru (*Cereus***) **for antimicrobial property**

João Alfredo Teodoro1, Marcus V. X. Senra1, Fernando F. Franco2, and Danilo T. Amaral1*

1Centro de Ciências Naturais e Humanas, Universidade Federal do ABC (UFABC), Santo André, São Paulo, Brasil.

2Departamento de Biologia. Centro de Ciências Humanas e Biológicas. Universidade Federal de São Carlos (UFSCar). Sorocaba, SP, 18052-780, Brazil.

*Corresponding author, Avenida dos Estados, 5001, bloco A, 504-3 room. ZIP CODE 09210-580, Santo André, Brasil. email: [danilo.trabuco@ufabc.edu.br](mailto:danilo.trabuco@ufabc.edu.br)

SUPPLEMENTARY FIGURES.


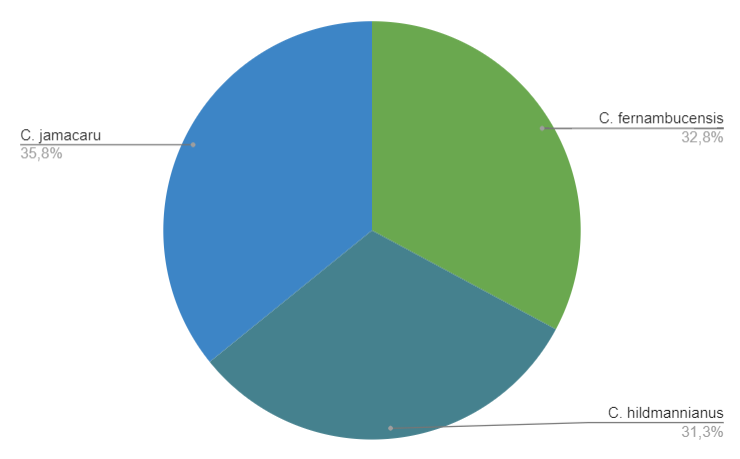


**Figure S1:** Percentage quantity of transcriptions by species of *Cereus* - Mandacaru (*C. fernambucensis, C. hildmannianus and C. jamacaru*).


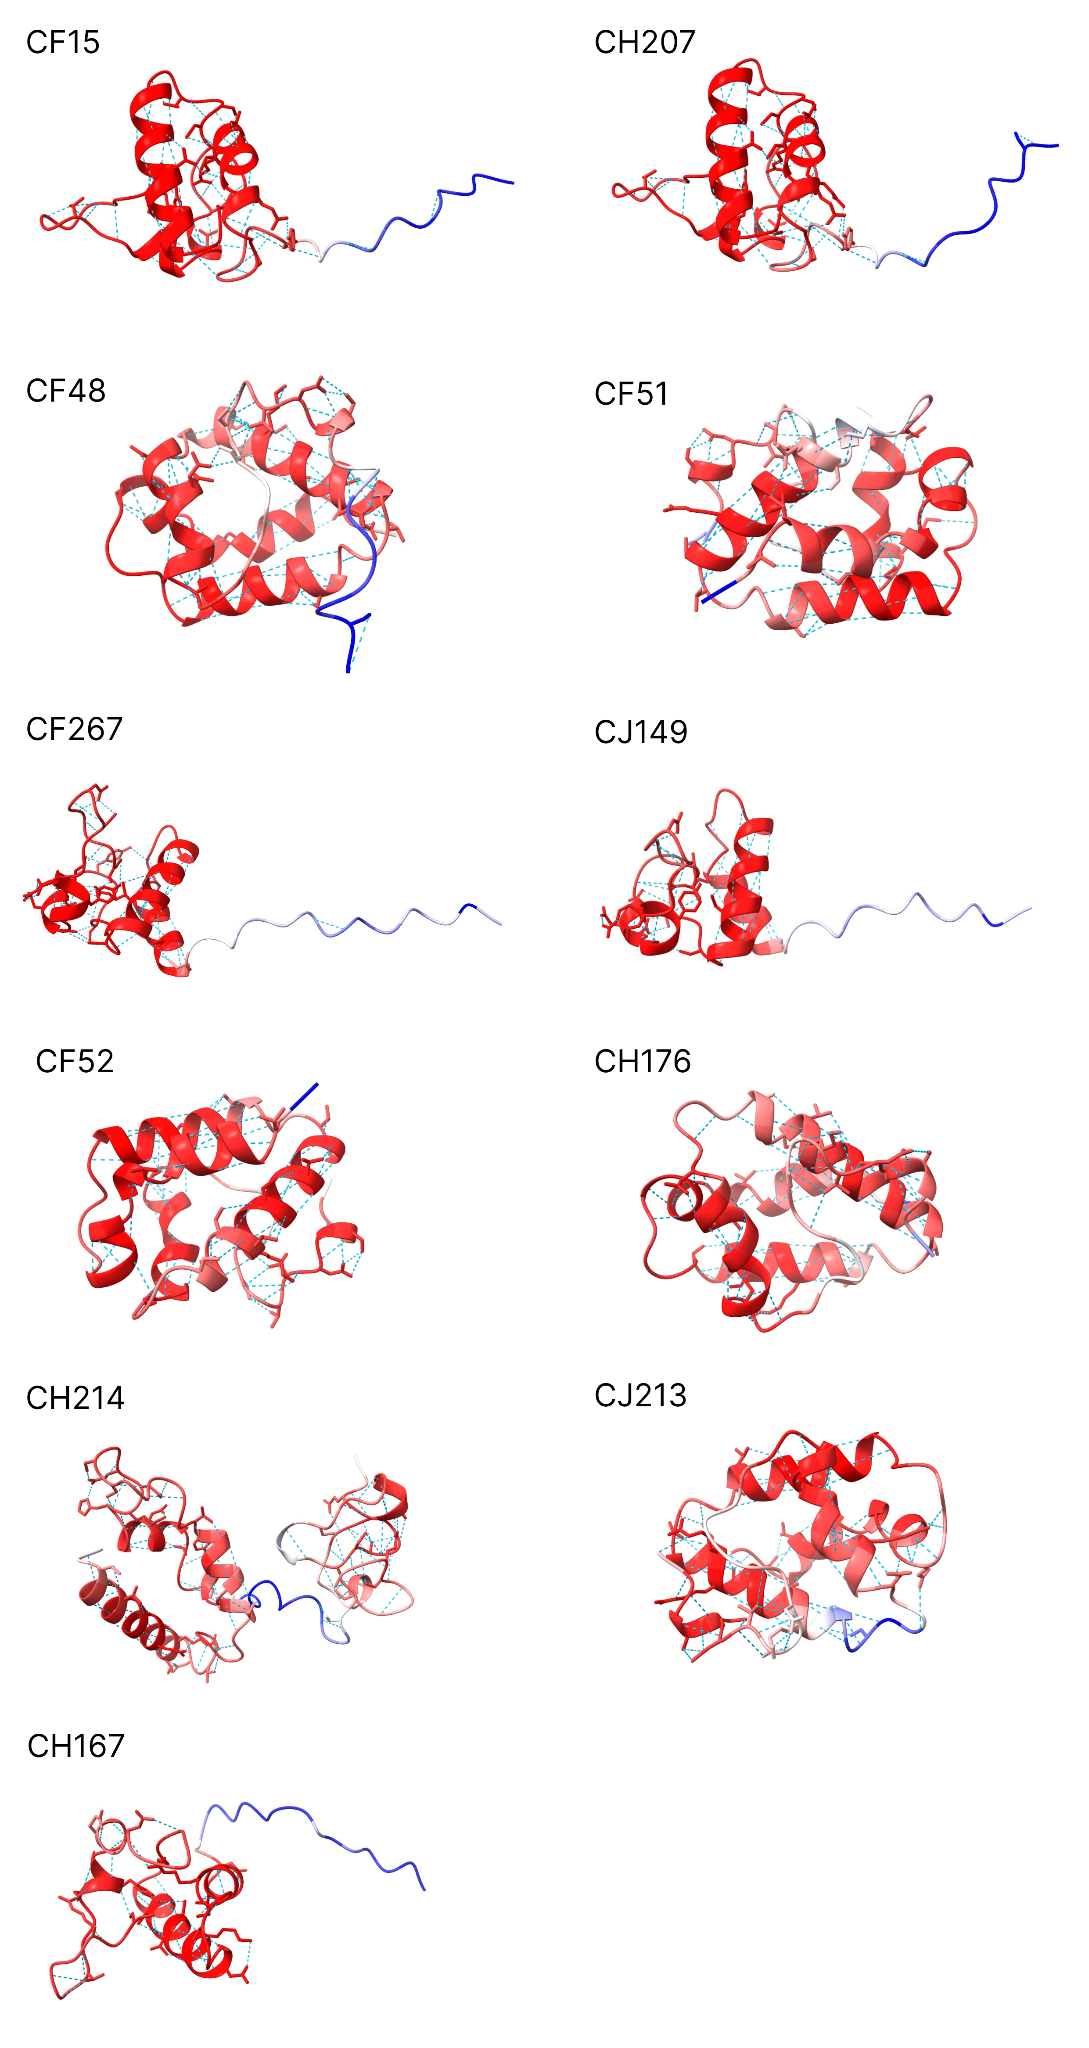


**Figure S2:** 3D modeling of peptide structures with their b-factor representation and the region of hydrogen bond interactions.


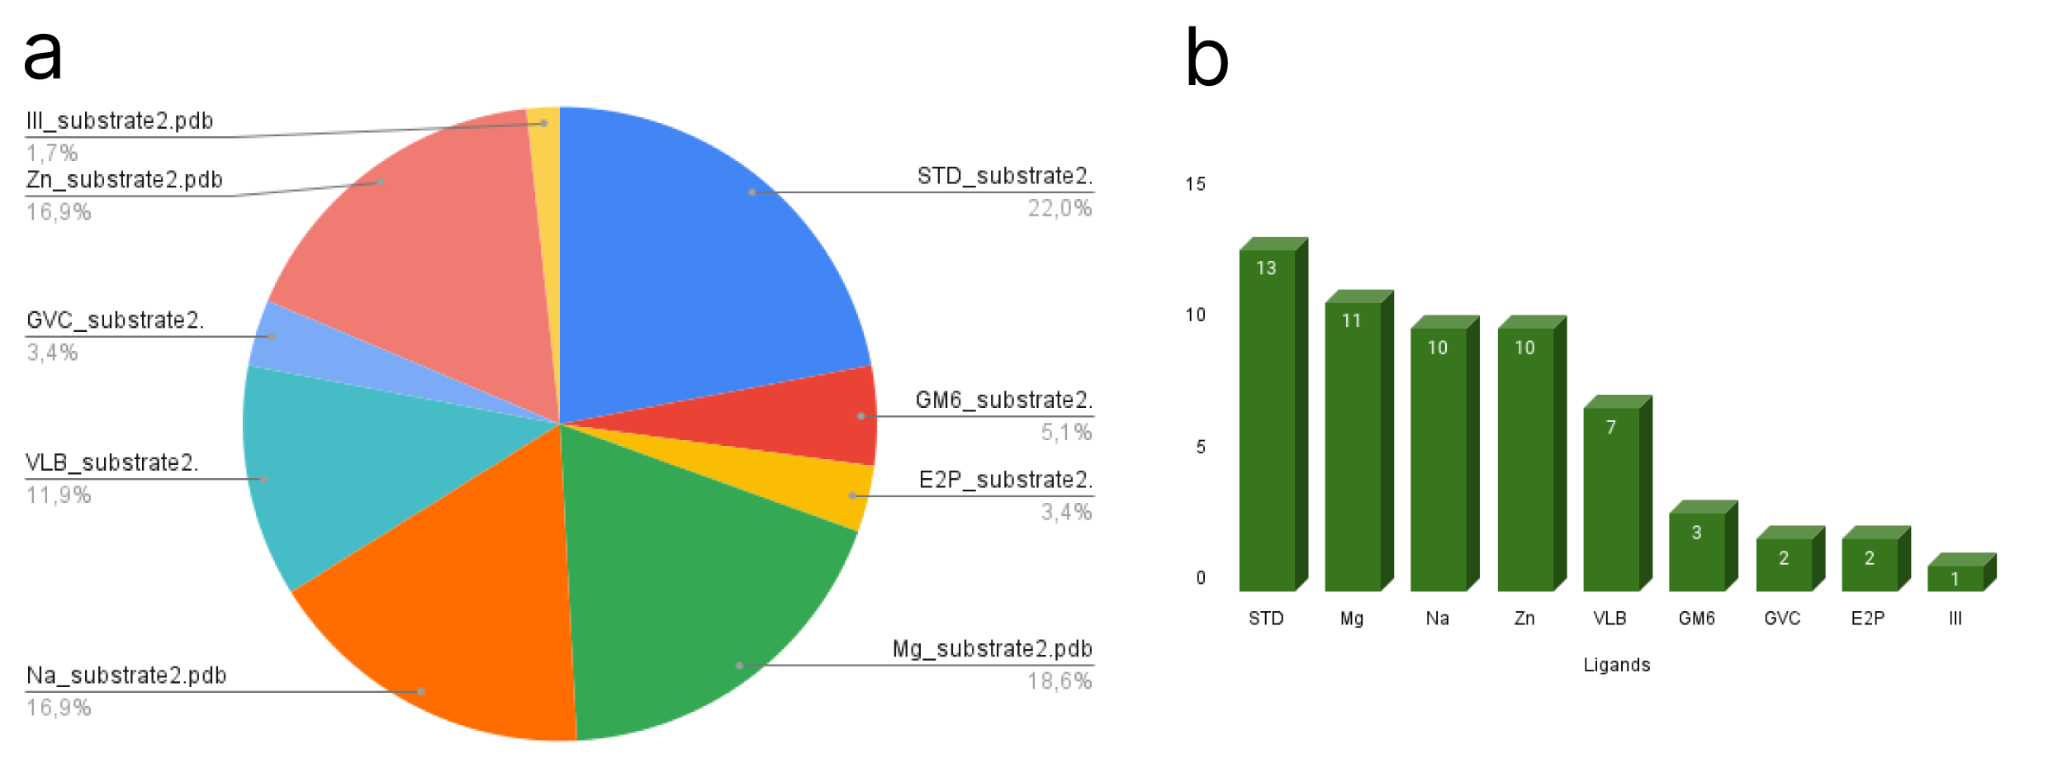


**Figure S3:** Number of peptide bindings per ligand used in the docking. a) The chart presents the percentage of peptides that have interaction with potential ligands for molecular docking. b) Bar representation of the number of ligands per peptide as a result of the cofactor system.

**
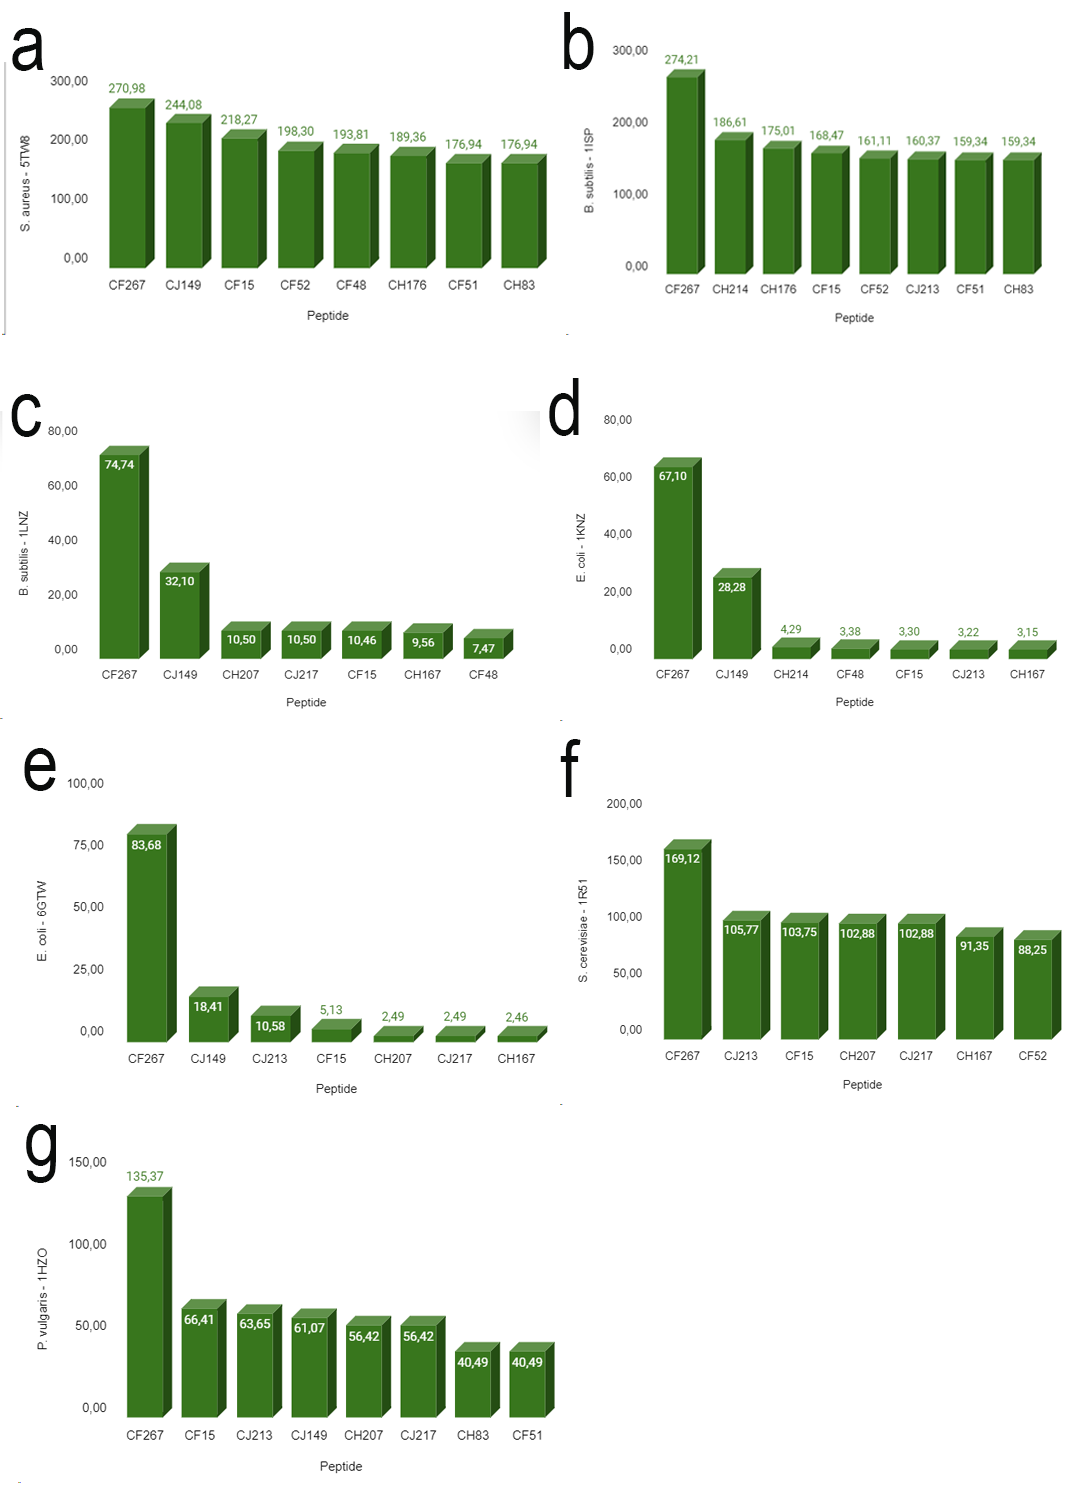
**

**Figure S4:** Filtering of the median binding scores between pathogens proteins versus peptides (a) *S. aureus* - 5TW8 x Peptides. (b)  *B. subitilis* - 1ISP x Peptides. (c) *B. subitilis* - 1LNZ x Peptides. (d) *E. coli* - 1KNZ x Peptides. (e) *E. coli* - 6GTW x Peptides. (f) *S. cerevisiae* - 1R51 x Peptides. (g) *P. vulgaris* - 1HZO x Peptides.

A


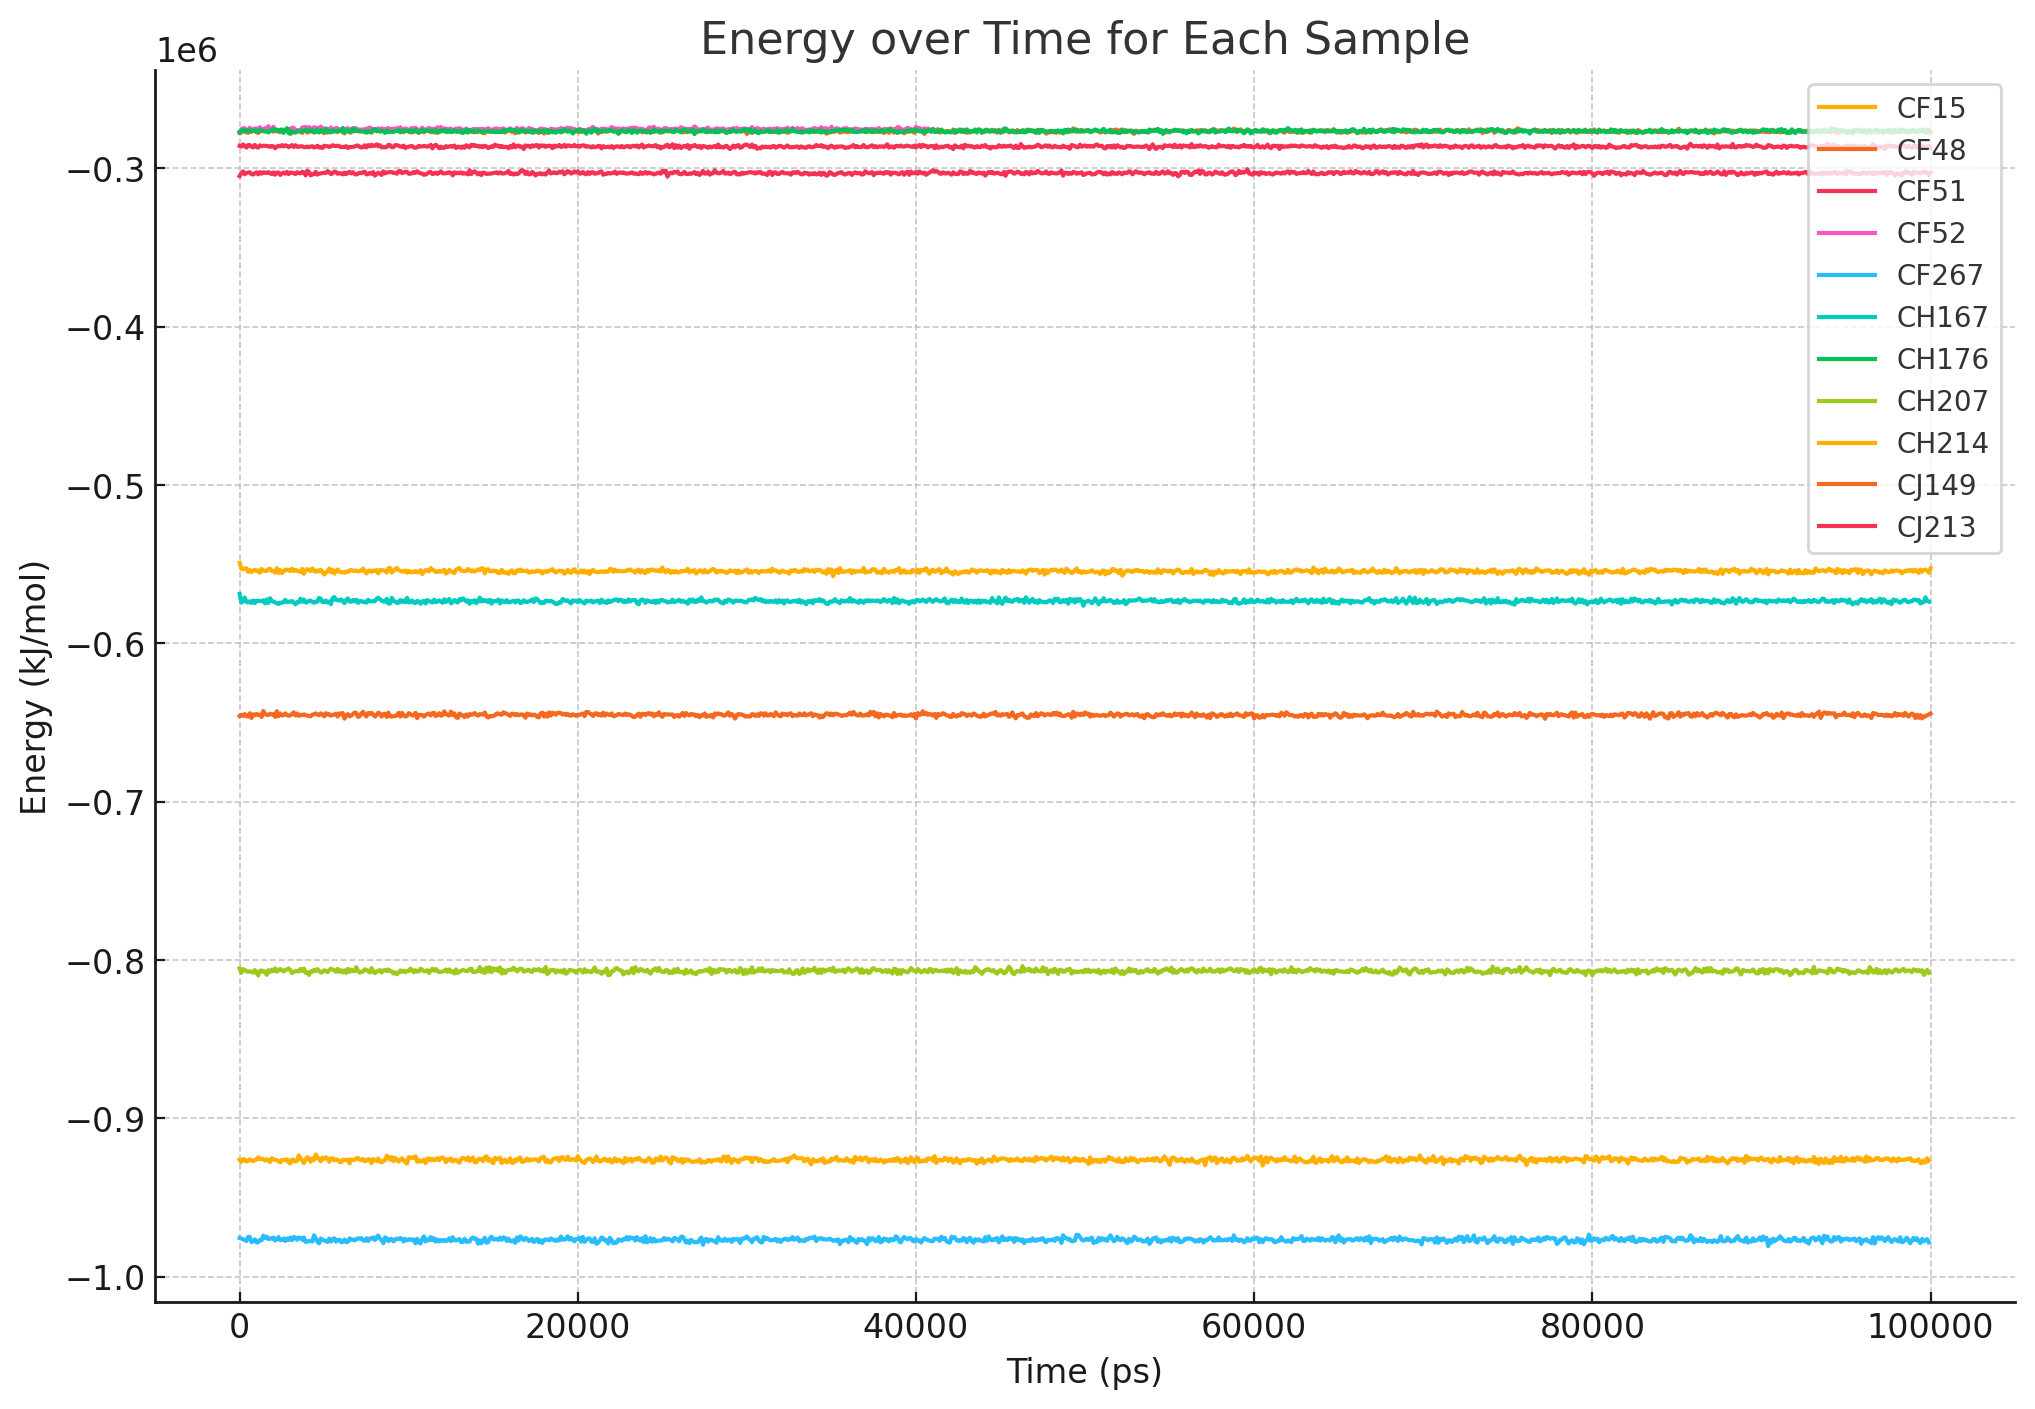


B


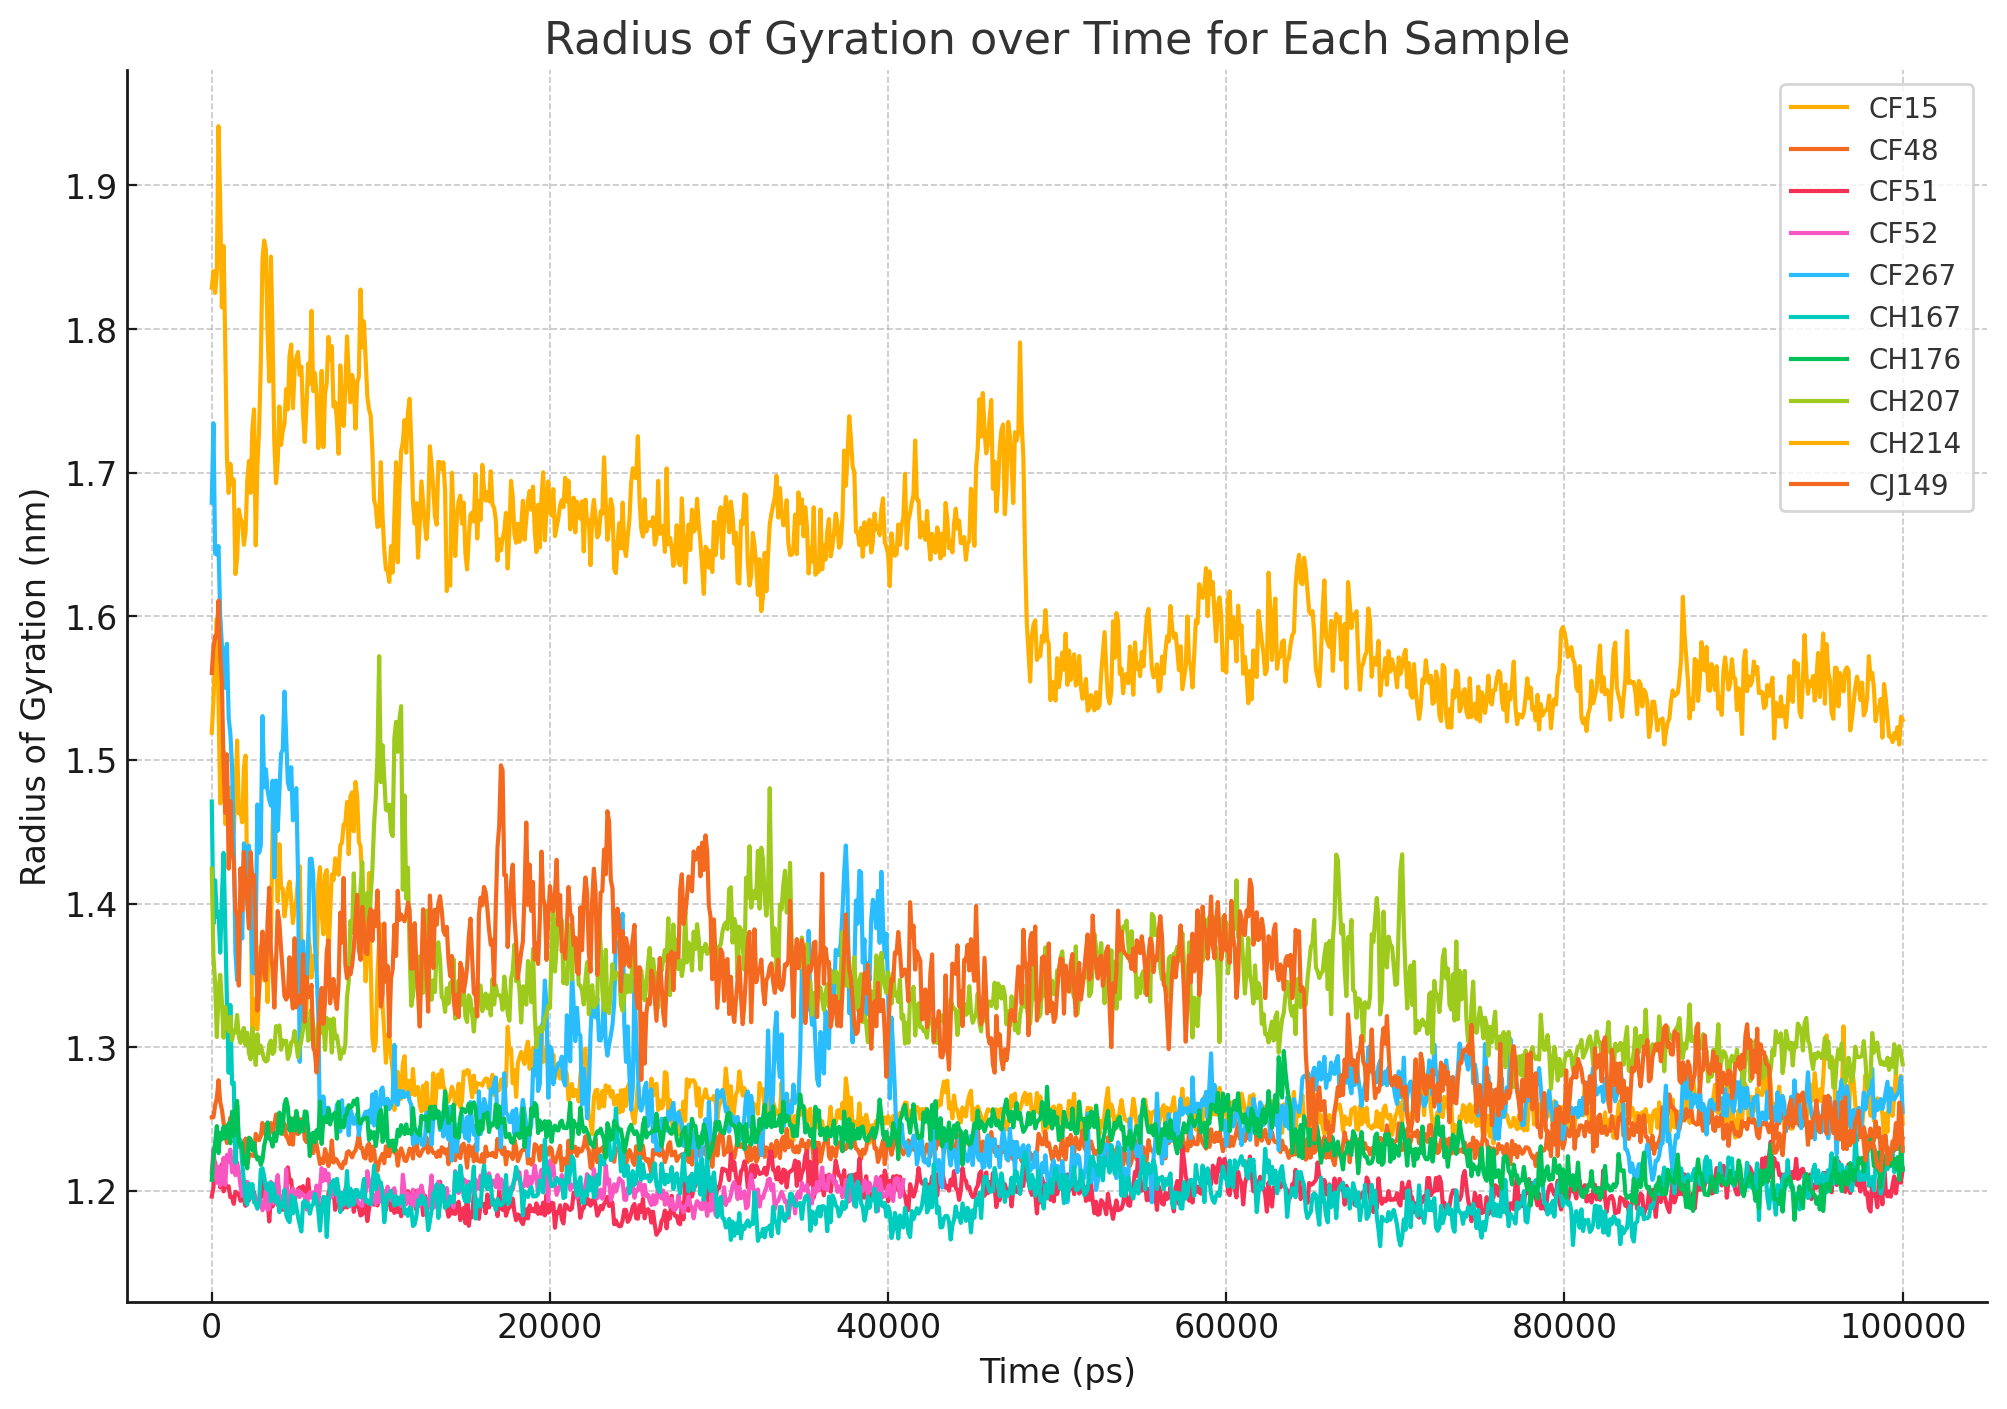


**Figure S5:** Plot represents (A) energy as a function of time and (B) radius of gyrations as a function of time for AMPs systems simulated in a molecular dynamics environment. The time scale is in picoseconds (ps).

SUPPLEMENTARY TABLES.

**Table S1:** Table of the possible substrates and ligand-binding sites on our target peptide, includes the PDB code, chemical formula, and names of the substrates.

| PDB Code | Chemical Formula | Substrate |
| --- | --- | --- |
| BLG | C16H30N3O14S2 | 4-O-(4-O-SULFONYL-N-ACETYLGLUCOSAMININYL)-5-METHYLHYDROXY-L-PROLINE-TAURINE |
| DAO | C12H24O2 | LAURIC ACID |
| E2P | C20H30O4 | PROSTAGLANDIN B2 |
| GM6 | C20H28N4O4 | 3-(N-HYDROXYCARBOXAMIDO)-2-ISOBUTYLPROPANOYL-TRP-METHYLAMIDE |
| GVC | C10H7Cl2N3O2 | 1-(3,5-DICHLOROPHENYL)-5-METHYL-1H-1,2,4-TRIAZOLE-3-CARBOXYLIC ACID |
| HP6 | C7H16 | HEPTANE |
| III | C14H18N4 | ~{N},~{N}-dimethyl-2-pyrrolidin-1-yl-quinazolin-4-amine |
| LAP | C20H43NO7P | [2-((1-OXODODECANOXY-(2-HYDROXY-3-PROPANYL))-PHOSPHONATE-OXY)-ETHYL]-TRIMETHYLAMMONIUM |
| LNL | C18H30O2 | ALPHA-LINOLENIC ACID |
| LPC | C22H47NO7P | [1-MYRISTOYL-GLYCEROL-3-YL]PHOSPHONYLCHOLINE |
| MG | Mg | MAGNESIUM ION |
| NA | Na | SODIUM ION |
| NDG | C8H15NO6 | 2-ACETAMIDO-2-DEOXY-ALPHA-D-GLUCOPYRANOSE |
| PAF | C6H11O4 | PANTOATE |
| PAM | C16H30O2 | PALMITOLEIC ACID |
| PO4 | O4P | PHOSPHATE ION |
| QNA | C10H9BFO5 | (1~{a}~{R},7~{b}~{S})-5-FLUORANYL-2,2-BIS(OXIDANYL)-1~{a},7~{b}-DYHIIDRO-1~{H}-CYCLOPROPA[c][1,2]BENZOXABORININE-4-CARBIOXYLIC-ACID |
| STD | C32H44N2O9 | STREPTOLYDIGIN |
| STE | C18H36O2 | STEARIC ACID |
| TFA | C2HF3O2 | TRIFLUOROACETIC ACID |
| VLB | C46H58N4O9 | (2ALPHA,2'BETA,3BETA,4ALPHA,5BETA)-VINCALEUKOBLASTINE |
| ZN | ZN | Zinc ion |

**Table S2:** Classification of the docking score for the interaction between peptides and ligands, using a median filter of -6.365 from the obtained raw data.

| Peptide | Ligand | Score |
| --- | --- | --- |
| T16 | STD | -10.080 |
| T33 | STD | -8.143 |
| T16 | GM6 | -7.969 |
| T26 | STD | -7.778 |
| T27 | STD | -7.772 |
| T16 | E2P | -7.501 |
| T23 | STD | -7.500 |
| T29 | STD | -7.401 |
| T1 | STD | -7.400 |
| T28 | STD | -7.384 |
| T2 | STD | -7.268 |
| T41 | Mg | -7.205 |
| T41 | Na | -7.205 |
| T2 | VLB | -7.193 |
| T4 | STD | -7.146 |
| T65 | STD | -7.135 |
| T22 | STD | -7.043 |
| T23 | GVC | -6.996 |
| T1 | Mg | -6.926 |
| T1 | Na | -6.924 |
| T1 | Zn | -6.924 |
| T22 | GVC | -6.894 |
| T26 | Mg | -6.876 |
| T26 | Na | -6.876 |
| T26 | Zn | -6.876 |
| T23 | VLB | -6.865 |
| T65 | VLB | -6.807 |
| T33 | III | -6.780 |
| T2 | Mg | -6.735 |
| T4 | Mg | -6.735 |
| T2 | Na | -6.735 |
| T4 | Na | -6.735 |
| T2 | Zn | -6.735 |
| T4 | Zn | -6.735 |
| T16 | Mg | -6.675 |
| T16 | Na | -6.675 |
| T16 | Zn | -6.675 |
| T4 | VLB | -6.630 |
| T33 | GM6 | -6.618 |
| T26 | VLB | -6.597 |
| T27 | VLB | -6.543 |
| T27 | GM6 | -6.536 |
| T33 | Mg | -6.535 |
| T33 | Na | -6.535 |
| T33 | Zn | -6.535 |
| T27 | Zn | -6.516 |
| T27 | Mg | -6.515 |
| T27 | Na | -6.515 |
| T29 | Zn | -6.477 |
| T33 | VLB | -6.470 |
| T29 | Na | -6.469 |
| T29 | Mg | -6.468 |
| T23 | Zn | -6.447 |
| T22 | Mg | -6.445 |
| T22 | Zn | -6.443 |
| T23 | Na | -6.442 |
| T23 | Mg | -6.436 |
| T28 | E2P | -6.371 |
| T41 | STD | -6.365 |

**Table S3:** Best docking scores analyzing only the interaction between the selected peptides and the proteins of Gram-negative bacterial species

| **Peptide** | **E. coli**  **1KNZ** | **E. coli**  **6GTW** | **P. vulgaris**  **1HZO** |
| --- | --- | --- | --- |
| CF267 | 67,10 | 83,68 | 135,37 |
| CJ149 | 28,28 | 18,41 | 61,07 |
| CF15 | 3,30 | 5,13 | 66,41 |
| CJ213 | 3,22 | 10,58 | 63,65S |

**Table S4:** Mean RMSD and standard deviation for molecular dynamics simulations of each AMP.

| **AMP** | **Mean RMSD** | **Std Dev RMSD** |
| --- | --- | --- |
| CF48 | 607 | 70 |
| CH176 | 818 | 56 |
| CF267 | 887 | 155 |
| CJ149 | 922 | 95 |
| CF52 | 1.100 | 155 |
| CF51 | 1.286 | 174 |
| CH214 | 1.436 | 179 |
| CH167 | 1.458 | 284 |
| CJ213 | 2.057 | 320 |
| CH207 | 2.458 | 342 |
| CF15 | 3.015 | 472 |
